# Supplementary material for: Exercise-Induced Fatigue and Caffeine Supplementation Affect Psychomotor Performance but Not Covert Visuo-Spatial Attention
Source: PLoS One. 2016 Oct 21;11(10):e0165318. doi: 10.1371/journal.pone.0165318 (PMC5074788; doi:10.1371/journal.pone.0165318)
Supplement: S1 Dataset — (XLSX) [file pone.0165318.s001.xlsx]

## Sheet: Exercise Study
Participant	Intervention	Trial (1/2)	Time Point(pre/post)	Condition (Endogenous/Exogenous)	Cue Type (valid/invalid/neutral)	Reaction Time (sec)	% Correct
1	Caffeine	1	pre	Endogenous	valid	0.289187	100
1	Caffeine	1	pre	Endogenous	invalid	0.292667	100
1	Caffeine	1	pre	Endogenous	neutral	0.279966	100
1	Caffeine	1	pre	Exogenous	valid	0.299852	100
1	Caffeine	1	pre	Exogenous	invalid	0.312517	100
1	Caffeine	1	pre	Exogenous	neutral	0.279862	100
1	Caffeine	1	post	Endogenous	valid	0.29831	100
1	Caffeine	1	post	Endogenous	invalid	0.3227	90.9091
1	Caffeine	1	post	Endogenous	neutral	0.332552	100
1	Caffeine	1	post	Exogenous	valid	0.310862	100
1	Caffeine	1	post	Exogenous	invalid	0.331607	100
1	Caffeine	1	post	Exogenous	neutral	0.342964	96.5517
1	Placebo	2	pre	Endogenous	valid	0.269854	100
1	Placebo	2	pre	Endogenous	invalid	0.296	91.6667
1	Placebo	2	pre	Endogenous	neutral	0.270517	100
1	Placebo	2	pre	Exogenous	valid	0.293655	96.6667
1	Placebo	2	pre	Exogenous	invalid	0.278286	96.5517
1	Placebo	2	pre	Exogenous	neutral	0.291179	100
1	Placebo	2	post	Endogenous	valid	0.274818	100
1	Placebo	2	post	Endogenous	invalid	0.35	100
1	Placebo	2	post	Endogenous	neutral	0.316429	100
1	Placebo	2	post	Exogenous	valid	0.326033	100
1	Placebo	2	post	Exogenous	invalid	0.296828	96.6667
1	Placebo	2	post	Exogenous	neutral	0.325483	100
2	Placebo	2	pre	Endogenous	valid	0.272532	100
2	Placebo	2	pre	Endogenous	invalid	0.293667	100
2	Placebo	2	pre	Endogenous	neutral	0.297038	100
2	Placebo	2	pre	Exogenous	valid	0.273067	100
2	Placebo	2	pre	Exogenous	invalid	0.30663	100
2	Placebo	2	pre	Exogenous	neutral	0.300448	100
2	Placebo	2	post	Endogenous	valid	0.281867	100
2	Placebo	2	post	Endogenous	invalid	0.328273	100
2	Placebo	2	post	Endogenous	neutral	0.309962	100
2	Placebo	2	post	Exogenous	valid	0.334067	100
2	Placebo	2	post	Exogenous	invalid	0.359	100
2	Placebo	2	post	Exogenous	neutral	0.339033	100
2	Caffeine	3	pre	Endogenous	valid	0.288065	100
2	Caffeine	3	pre	Endogenous	invalid	0.310545	100
2	Caffeine	3	pre	Endogenous	neutral	0.301767	100
2	Caffeine	3	pre	Exogenous	valid	0.334067	100
2	Caffeine	3	pre	Exogenous	invalid	0.358556	100
2	Caffeine	3	pre	Exogenous	neutral	0.337107	100
2	Caffeine	3	post	Endogenous	valid	0.260149	97.9167
2	Caffeine	3	post	Endogenous	invalid	0.3243	100
2	Caffeine	3	post	Endogenous	neutral	0.279964	100
2	Caffeine	3	post	Exogenous	valid	0.261467	100
2	Caffeine	3	post	Exogenous	invalid	0.299103	100
2	Caffeine	3	post	Exogenous	neutral	0.285034	100
3	Caffeine	2	pre	Endogenous	valid	0.281111	100
3	Caffeine	2	pre	Endogenous	invalid	0.313636	91.6667
3	Caffeine	2	pre	Endogenous	neutral	0.285852	96.4286
3	Caffeine	2	pre	Exogenous	valid	0.306071	100
3	Caffeine	2	pre	Exogenous	invalid	0.316231	92.8571
3	Caffeine	2	pre	Exogenous	neutral	0.317429	100
3	Caffeine	2	post	Endogenous	valid	0.28975	100
3	Caffeine	2	post	Endogenous	invalid	0.281636	100
3	Caffeine	2	post	Endogenous	neutral	0.2719	100
3	Caffeine	2	post	Exogenous	valid	0.274276	100
3	Caffeine	2	post	Exogenous	invalid	0.282643	96.5517
3	Caffeine	2	post	Exogenous	neutral	0.325357	96.5517
3	Placebo	3	pre	Endogenous	valid	0.278149	100
3	Placebo	3	pre	Endogenous	invalid	0.326636	91.6667
3	Placebo	3	pre	Endogenous	neutral	0.284138	100
3	Placebo	3	pre	Exogenous	valid	0.268607	100
3	Placebo	3	pre	Exogenous	invalid	0.291179	100
3	Placebo	3	pre	Exogenous	neutral	0.30576	100
3	Placebo	3	post	Endogenous	valid	0.293553	100
3	Placebo	3	post	Endogenous	invalid	0.336727	100
3	Placebo	3	post	Endogenous	neutral	0.29863	100
3	Placebo	3	post	Exogenous	valid	0.356103	96.6667
3	Placebo	3	post	Exogenous	invalid	0.318222	90
3	Placebo	3	post	Exogenous	neutral	0.368815	96.4286
4	Placebo	1	pre	Endogenous	valid	0.330021	100
4	Placebo	1	pre	Endogenous	invalid	0.359417	100
4	Placebo	1	pre	Endogenous	neutral	0.317179	96.5517
4	Placebo	1	pre	Exogenous	valid	0.3084	100
4	Placebo	1	pre	Exogenous	invalid	0.320679	96.5517
4	Placebo	1	pre	Exogenous	neutral	0.323967	100
4	Placebo	1	post	Endogenous	valid	0.35807	100
4	Placebo	1	post	Endogenous	invalid	0.413727	100
4	Placebo	1	post	Endogenous	neutral	0.363767	100
4	Placebo	1	post	Exogenous	valid	0.327379	100
4	Placebo	1	post	Exogenous	invalid	0.349483	100
4	Placebo	1	post	Exogenous	neutral	0.41169	100
4	Caffeine	2	pre	Endogenous	valid	0.283022	93.75
4	Caffeine	2	pre	Endogenous	invalid	0.305818	91.6667
4	Caffeine	2	pre	Endogenous	neutral	0.308467	100
4	Caffeine	2	pre	Exogenous	valid	0.281467	100
4	Caffeine	2	pre	Exogenous	invalid	0.287552	96.6667
4	Caffeine	2	pre	Exogenous	neutral	0.3084	100
4	Caffeine	2	post	Endogenous	valid	0.258187	100
4	Caffeine	2	post	Endogenous	invalid	0.309545	91.6667
4	Caffeine	2	post	Endogenous	neutral	0.282269	92.8571
4	Caffeine	2	post	Exogenous	valid	0.253033	100
4	Caffeine	2	post	Exogenous	invalid	0.29163	100
4	Caffeine	2	post	Exogenous	neutral	0.293233	100
5	Placebo	1	pre	Endogenous	valid	0.262622	97.8261
5	Placebo	1	pre	Endogenous	invalid	0.3004	83.3333
5	Placebo	1	pre	Endogenous	neutral	0.302233	100
5	Placebo	1	pre	Exogenous	valid	0.262828	96.6667
5	Placebo	1	pre	Exogenous	invalid	0.293267	100
5	Placebo	1	pre	Exogenous	neutral	0.28831	96.6667
5	Placebo	1	post	Endogenous	valid	0.266583	100
5	Placebo	1	post	Endogenous	invalid	0.316273	91.6667
5	Placebo	1	post	Endogenous	neutral	0.306556	93.1034
5	Placebo	1	post	Exogenous	valid	0.253167	100
5	Placebo	1	post	Exogenous	invalid	0.305033	100
5	Placebo	1	post	Exogenous	neutral	0.322444	93.1034
5	Caffeine	3	pre	Endogenous	valid	0.269417	100
5	Caffeine	3	pre	Endogenous	invalid	0.311818	91.6667
5	Caffeine	3	pre	Endogenous	neutral	0.280667	100
5	Caffeine	3	pre	Exogenous	valid	0.274	100
5	Caffeine	3	pre	Exogenous	invalid	0.3102	100
5	Caffeine	3	pre	Exogenous	neutral	0.285071	93.3333
5	Caffeine	3	post	Endogenous	valid	0.255875	100
5	Caffeine	3	post	Endogenous	invalid	0.30025	100
5	Caffeine	3	post	Endogenous	neutral	0.2606	100
5	Caffeine	3	post	Exogenous	valid	0.2645	100
5	Caffeine	3	post	Exogenous	invalid	0.297037	90
5	Caffeine	3	post	Exogenous	neutral	0.309793	96.6667
6	Caffeine	1	pre	Endogenous	valid	0.269043	100
6	Caffeine	1	pre	Endogenous	invalid	0.3118	90.9091
6	Caffeine	1	pre	Endogenous	neutral	0.307655	100
6	Caffeine	1	pre	Exogenous	valid	0.2964	100
6	Caffeine	1	pre	Exogenous	invalid	0.3104	100
6	Caffeine	1	pre	Exogenous	neutral	0.297533	100
6	Caffeine	1	post	Endogenous	valid	0.278957	100
6	Caffeine	1	post	Endogenous	invalid	0.308455	91.6667
6	Caffeine	1	post	Endogenous	neutral	0.287	100
6	Caffeine	1	post	Exogenous	valid	0.2724	100
6	Caffeine	1	post	Exogenous	invalid	0.271931	96.6667
6	Caffeine	1	post	Exogenous	neutral	0.273448	100
6	Placebo	2	pre	Endogenous	valid	0.324437	100
6	Placebo	2	pre	Endogenous	invalid	0.324091	91.6667
6	Placebo	2	pre	Endogenous	neutral	0.308103	100
6	Placebo	2	pre	Exogenous	valid	0.339667	100
6	Placebo	2	pre	Exogenous	invalid	0.349067	100
6	Placebo	2	pre	Exogenous	neutral	0.303448	96.6667
6	Placebo	2	post	Endogenous	valid	0.361729	100
6	Placebo	2	post	Endogenous	invalid	0.365667	100
6	Placebo	2	post	Endogenous	neutral	0.355172	100
6	Placebo	2	post	Exogenous	valid	0.3375	100
6	Placebo	2	post	Exogenous	invalid	0.379448	100
6	Placebo	2	post	Exogenous	neutral	0.3228	100
7	Caffeine	1	pre	Endogenous	valid	0.283	97.8723
7	Caffeine	1	pre	Endogenous	invalid	0.2775	100
7	Caffeine	1	pre	Endogenous	neutral	0.2735	100
7	Caffeine	1	pre	Exogenous	valid	0.292615	86.6667
7	Caffeine	1	pre	Exogenous	invalid	0.257143	93.3333
7	Caffeine	1	pre	Exogenous	neutral	0.283654	100
7	Caffeine	1	post	Endogenous	valid	0.344391	97.8723
7	Caffeine	1	post	Endogenous	invalid	0.328	90.9091
7	Caffeine	1	post	Endogenous	neutral	0.345036	96.5517
7	Caffeine	1	post	Exogenous	valid	0.352	93.3333
7	Caffeine	1	post	Exogenous	invalid	0.339571	100
7	Caffeine	1	post	Exogenous	neutral	0.333379	96.6667
7	Placebo	3	pre	Endogenous	valid	0.289949	92.8571
7	Placebo	3	pre	Endogenous	invalid	0.319667	100
7	Placebo	3	pre	Endogenous	neutral	0.306643	100
7	Placebo	3	pre	Exogenous	valid	0.264	84.6154
7	Placebo	3	pre	Exogenous	invalid	0.293607	96.5517
7	Placebo	3	pre	Exogenous	neutral	0.29392	89.2857
7	Placebo	3	post	Endogenous	valid	0.250929	95.4545
7	Placebo	3	post	Endogenous	invalid	0.286818	91.6667
7	Placebo	3	post	Endogenous	neutral	0.320462	100
7	Placebo	3	post	Exogenous	valid	0.292815	96.4286
7	Placebo	3	post	Exogenous	invalid	0.373296	93.1034
7	Placebo	3	post	Exogenous	neutral	0.285519	93.1034
8	Placebo	2	pre	Endogenous	valid	0.326766	100
8	Placebo	2	pre	Endogenous	invalid	0.429909	91.6667
8	Placebo	2	pre	Endogenous	neutral	0.373069	100
8	Placebo	2	pre	Exogenous	valid	0.335931	100
8	Placebo	2	pre	Exogenous	invalid	0.438036	96.5517
8	Placebo	2	pre	Exogenous	neutral	0.399103	96.6667
8	Placebo	2	post	Endogenous	valid	0.409053	100
8	Placebo	2	post	Endogenous	invalid	0.547444	90
8	Placebo	2	post	Endogenous	neutral	0.487318	100
8	Placebo	2	post	Exogenous	valid	0.44252	100
8	Placebo	2	post	Exogenous	invalid	0.52584	96.1538
8	Placebo	2	post	Exogenous	neutral	0.394448	100
8	Caffeine	3	pre	Endogenous	valid	0.322244	100
8	Caffeine	3	pre	Endogenous	invalid	0.406091	100
8	Caffeine	3	pre	Endogenous	neutral	0.362448	100
8	Caffeine	3	pre	Exogenous	valid	0.344333	100
8	Caffeine	3	pre	Exogenous	invalid	0.414214	96.5517
8	Caffeine	3	pre	Exogenous	neutral	0.438704	100
8	Caffeine	3	post	Endogenous	valid	0.260786	100
8	Caffeine	3	post	Endogenous	invalid	0.383889	90
8	Caffeine	3	post	Endogenous	neutral	0.306966	96.6667
8	Caffeine	3	post	Exogenous	valid	0.333586	100
8	Caffeine	3	post	Exogenous	invalid	0.427929	96.5517
8	Caffeine	3	post	Exogenous	neutral	0.3196	100
9	Caffeine	1	pre	Endogenous	valid	0.265341	97.619
9	Caffeine	1	pre	Endogenous	invalid	0.282333	81.8182
9	Caffeine	1	pre	Endogenous	neutral	0.26225	100
9	Caffeine	1	pre	Exogenous	valid	0.3025	100
9	Caffeine	1	pre	Exogenous	invalid	0.318607	100
9	Caffeine	1	pre	Exogenous	neutral	0.245393	96.5517
9	Caffeine	1	post	Endogenous	valid	0.382267	100
9	Caffeine	1	post	Endogenous	invalid	0.452222	100
9	Caffeine	1	post	Endogenous	neutral	0.426346	100
9	Caffeine	1	post	Exogenous	valid	0.383	100
9	Caffeine	1	post	Exogenous	invalid	0.415259	96.4286
9	Caffeine	1	post	Exogenous	neutral	0.409444	96.4286
9	Placebo	3	pre	Endogenous	valid	0.280195	100
9	Placebo	3	pre	Endogenous	invalid	0.3177	100
9	Placebo	3	pre	Endogenous	neutral	0.320741	100
9	Placebo	3	pre	Exogenous	valid	0.330179	100
9	Placebo	3	pre	Exogenous	invalid	0.333786	96.5517
9	Placebo	3	pre	Exogenous	neutral	0.306962	100
9	Placebo	3	post	Endogenous	valid	0.369125	94.1176
9	Placebo	3	post	Endogenous	invalid	0.457444	100
9	Placebo	3	post	Endogenous	neutral	0.401	100
9	Placebo	3	post	Exogenous	valid	0.43584	100
9	Placebo	3	post	Exogenous	invalid	0.420346	100
9	Placebo	3	post	Exogenous	neutral	0.4154	100
10	Caffeine	1	pre	Endogenous	valid	0.277298	100
10	Caffeine	1	pre	Endogenous	invalid	0.3635	100
10	Caffeine	1	pre	Endogenous	neutral	0.2986	100
10	Caffeine	1	pre	Exogenous	valid	0.321033	100
10	Caffeine	1	pre	Exogenous	invalid	0.3273	100
10	Caffeine	1	pre	Exogenous	neutral	0.316483	96.6667
10	Caffeine	1	post	Endogenous	valid	0.292271	100
10	Caffeine	1	post	Endogenous	invalid	0.377909	91.6667
10	Caffeine	1	post	Endogenous	neutral	0.326931	100
10	Caffeine	1	post	Exogenous	valid	0.302655	100
10	Caffeine	1	post	Exogenous	invalid	0.343133	100
10	Caffeine	1	post	Exogenous	neutral	0.401444	100
10	Placebo	3	pre	Endogenous	valid	0.2785	100
10	Placebo	3	pre	Endogenous	invalid	0.3868	100
10	Placebo	3	pre	Endogenous	neutral	0.310786	100
10	Placebo	3	pre	Exogenous	valid	0.322167	100
10	Placebo	3	pre	Exogenous	invalid	0.362867	100
10	Placebo	3	pre	Exogenous	neutral	0.338241	100
10	Placebo	3	post	Endogenous	valid	0.300089	100
10	Placebo	3	post	Endogenous	invalid	0.390556	90
10	Placebo	3	post	Endogenous	neutral	0.377964	96.5517
10	Placebo	3	post	Exogenous	valid	0.322567	100
10	Placebo	3	post	Exogenous	invalid	0.356867	100
10	Placebo	3	post	Exogenous	neutral	0.444704	100
11	Placebo	1	pre	Endogenous	valid	0.267915	100
11	Placebo	1	pre	Endogenous	invalid	0.33575	100
11	Placebo	1	pre	Endogenous	neutral	0.3168	100
11	Placebo	1	pre	Exogenous	valid	0.315233	100
11	Placebo	1	pre	Exogenous	invalid	0.340467	100
11	Placebo	1	pre	Exogenous	neutral	0.293931	100
11	Placebo	1	post	Endogenous	valid	0.284756	100
11	Placebo	1	post	Endogenous	invalid	0.3969	100
11	Placebo	1	post	Endogenous	neutral	0.356095	95.4545
11	Placebo	1	post	Exogenous	valid	0.339333	100
11	Placebo	1	post	Exogenous	invalid	0.373385	89.6552
11	Placebo	1	post	Exogenous	neutral	0.44232	96.1538
11	Caffeine	3	pre	Endogenous	valid	0.236437	100
11	Caffeine	3	pre	Endogenous	invalid	0.349818	91.6667
11	Caffeine	3	pre	Endogenous	neutral	0.290067	100
11	Caffeine	3	pre	Exogenous	valid	0.2805	100
11	Caffeine	3	pre	Exogenous	invalid	0.320207	100
11	Caffeine	3	pre	Exogenous	neutral	0.298276	96.6667
11	Caffeine	3	post	Endogenous	valid	0.235521	100
11	Caffeine	3	post	Endogenous	invalid	0.337364	91.6667
11	Caffeine	3	post	Endogenous	neutral	0.265233	100
11	Caffeine	3	post	Exogenous	valid	0.2513	100
11	Caffeine	3	post	Exogenous	invalid	0.305862	96.6667
11	Caffeine	3	post	Exogenous	neutral	0.269241	96.6667
12	Placebo	1	pre	Endogenous	valid	0.435778	100
12	Placebo	1	pre	Endogenous	invalid	0.4996	100
12	Placebo	1	pre	Endogenous	neutral	0.471286	100
12	Placebo	1	pre	Exogenous	valid	0.443433	100
12	Placebo	1	pre	Exogenous	invalid	0.447067	100
12	Placebo	1	pre	Exogenous	neutral	0.454276	100
12	Placebo	1	post	Endogenous	valid	0.492511	100
12	Placebo	1	post	Endogenous	invalid	0.463333	100
12	Placebo	1	post	Endogenous	neutral	0.463364	95.6522
12	Placebo	1	post	Exogenous	valid	0.449448	100
12	Placebo	1	post	Exogenous	invalid	0.523036	100
12	Placebo	1	post	Exogenous	neutral	0.504409	100
12	Caffeine	2	pre	Endogenous	valid	0.397	100
12	Caffeine	2	pre	Endogenous	invalid	0.437	100
12	Caffeine	2	pre	Endogenous	neutral	0.419207	100
12	Caffeine	2	pre	Exogenous	valid	0.408933	100
12	Caffeine	2	pre	Exogenous	invalid	0.430133	100
12	Caffeine	2	pre	Exogenous	neutral	0.434448	100
12	Caffeine	2	post	Endogenous	valid	0.372417	100
12	Caffeine	2	post	Endogenous	invalid	0.4529	100
12	Caffeine	2	post	Endogenous	neutral	0.406	100
12	Caffeine	2	post	Exogenous	valid	0.3845	100
12	Caffeine	2	post	Exogenous	invalid	0.449655	100
12	Caffeine	2	post	Exogenous	neutral	0.427793	100
